# Supplementary material
Source: MDPI journal article supplement (https://www.mdpi.com/2073-4395/10/5/728)
Supplement: s1 [file s1]

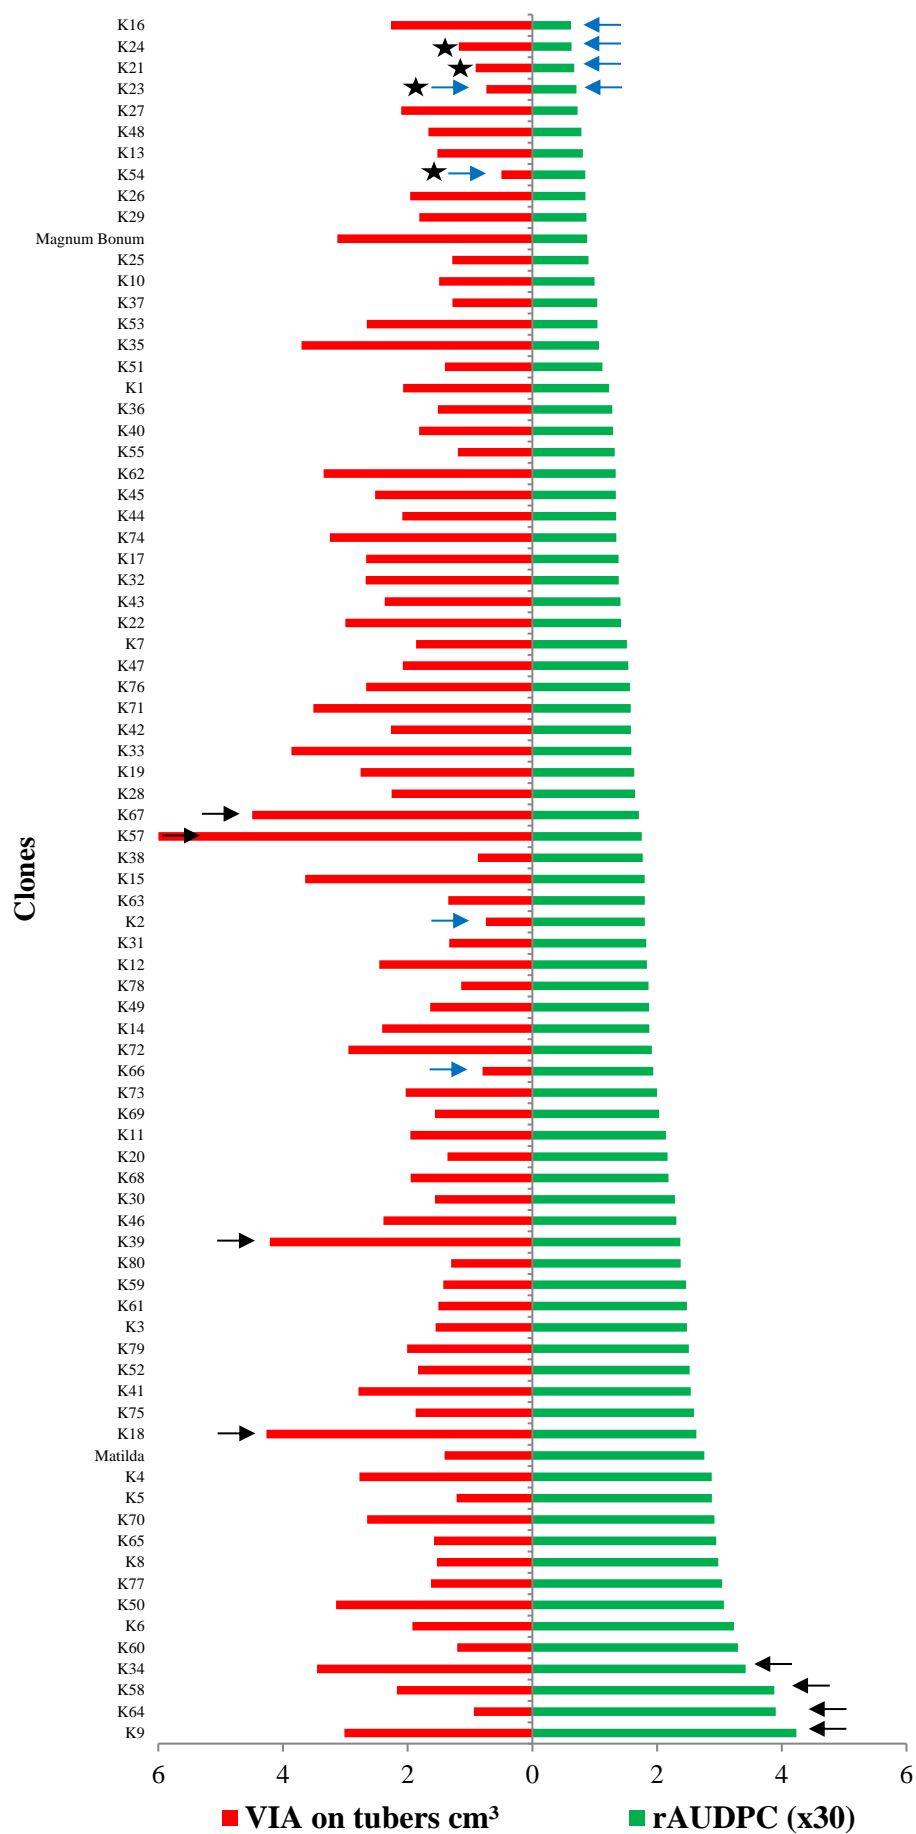

**Supplementary Figure 2.** Early blight resistance among the progenies of a bi-parental population in a field experiment (green, right) and in the tuber test (red, left). The bar chart represent mean of two field and tuber test experiments. (→ susceptible → resistant; ★ resistance to both foliar and tuber)
