# Supplementary material
Source: MDPI journal article supplement (https://www.mdpi.com/2073-4395/10/5/728)
Supplement: s1 [file s1]

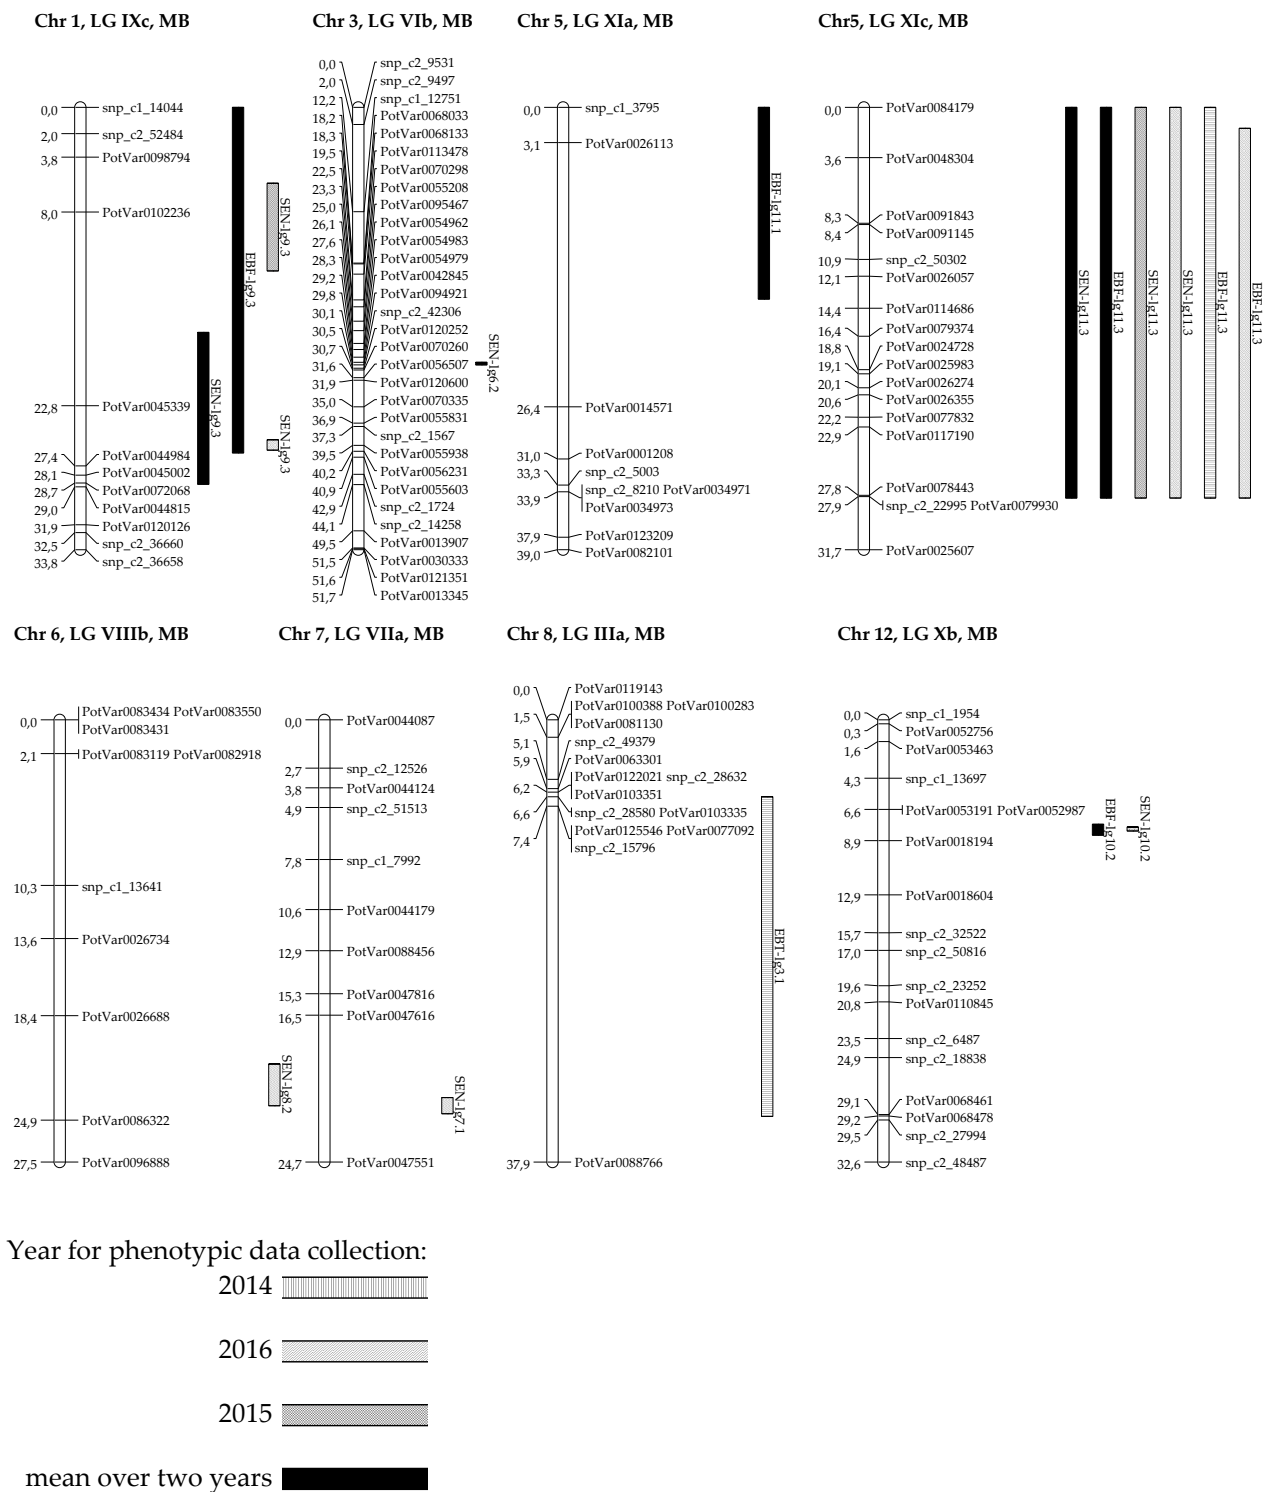

**Supplementary figure 3:** Linkage groups (LG) from linkage map created with Magnum Bonum (MB) as mapping parent, with significant QTL found using a reduced model for three; traits defoliation (SEN), foliar resistance to early blight (EBF) and tuber resistance to early blight (EBT). In rare cases, the linkage group represents a whole chromosome (Chr), this is only the case when the roman numerals are not followed by a miniscule (a-c). Along the linkage groups are the marker positions in centiMorgans and the SNP names. To the right of each linkage group are the QTL confidence intervals which reached a significant LOD score. The pattern of the confidence is to register which year the phenotypic data was collected. The names of the QTL can also be found in Table 2 and Table S1.

Chr 3, LG I, Mat

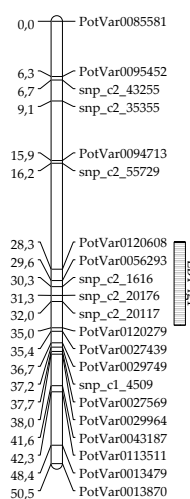

Chr 5, LG IXa, Mat

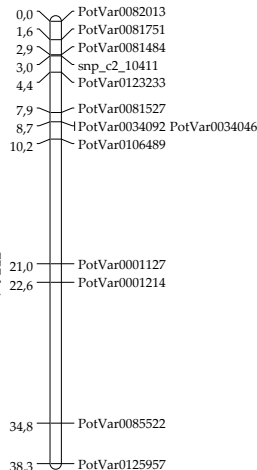

Chr 5, LG IXb, Mat

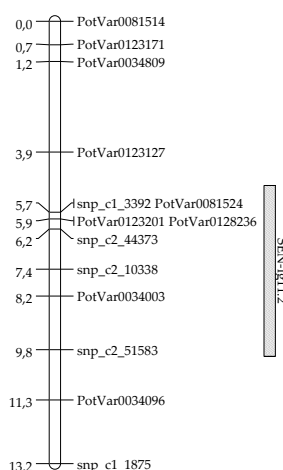

Chr 6, LG IIIb, Mat

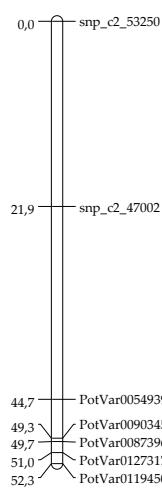

Chr 8, LG VI, Mat

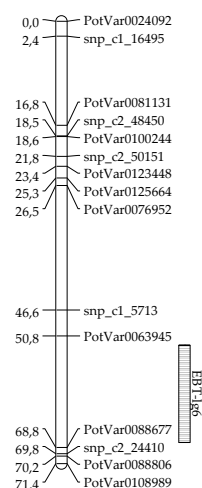

Chr 10, LG IVb, Mat

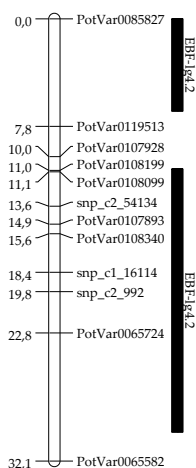

Chr 11, LG IXa, Mat

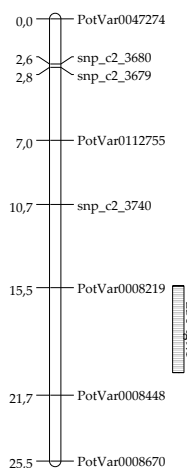

Chr 11, LG IXb, Mat

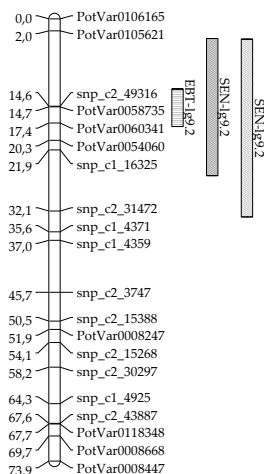

Chr 11, LG IXc, Mat

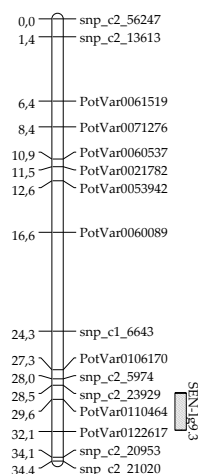

Chr 12, LG Va, Mat

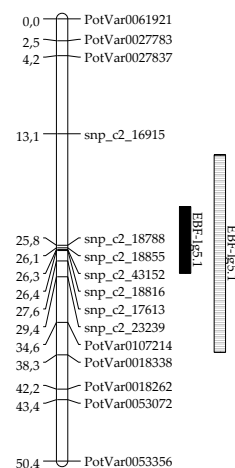

Chr 12, LG Vb, Mat

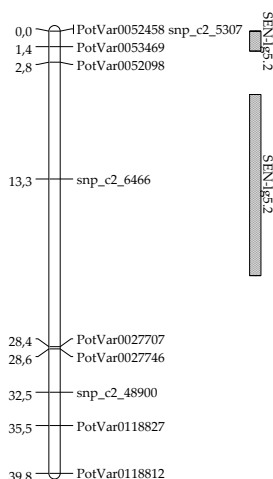

Year for phenotypic data collection:

2014

2016

2015

mean over two years

**Supplementary figure 4:** Linkage groups (LG) from linkage map created with Matilda (Mat) as mapping parent, with significant QTL found using a reduced model for three traits: defoliation (SEN), foliar resistance to early blight (EBF) and tuber resistance to early blight (EBT). In rare cases, the linkage group represents a whole chromosome (Chr), this is only the case when the roman numerals are not followed by a miniscule (a-c). Along the linkage groups are the marker positions in centiMorgans and the SNP names. To the right of each linkage group are the QTL confidence intervals which reached a significant LOD score. The pattern of the confidence is to register which year the phenotypic data was collected. The names of the QTL can also be found in Table 2 and Table S1.
