# Supplementary material
Source: MDPI journal article supplement (https://www.mdpi.com/2073-4395/10/5/728)
Supplement: s1 [file s1]

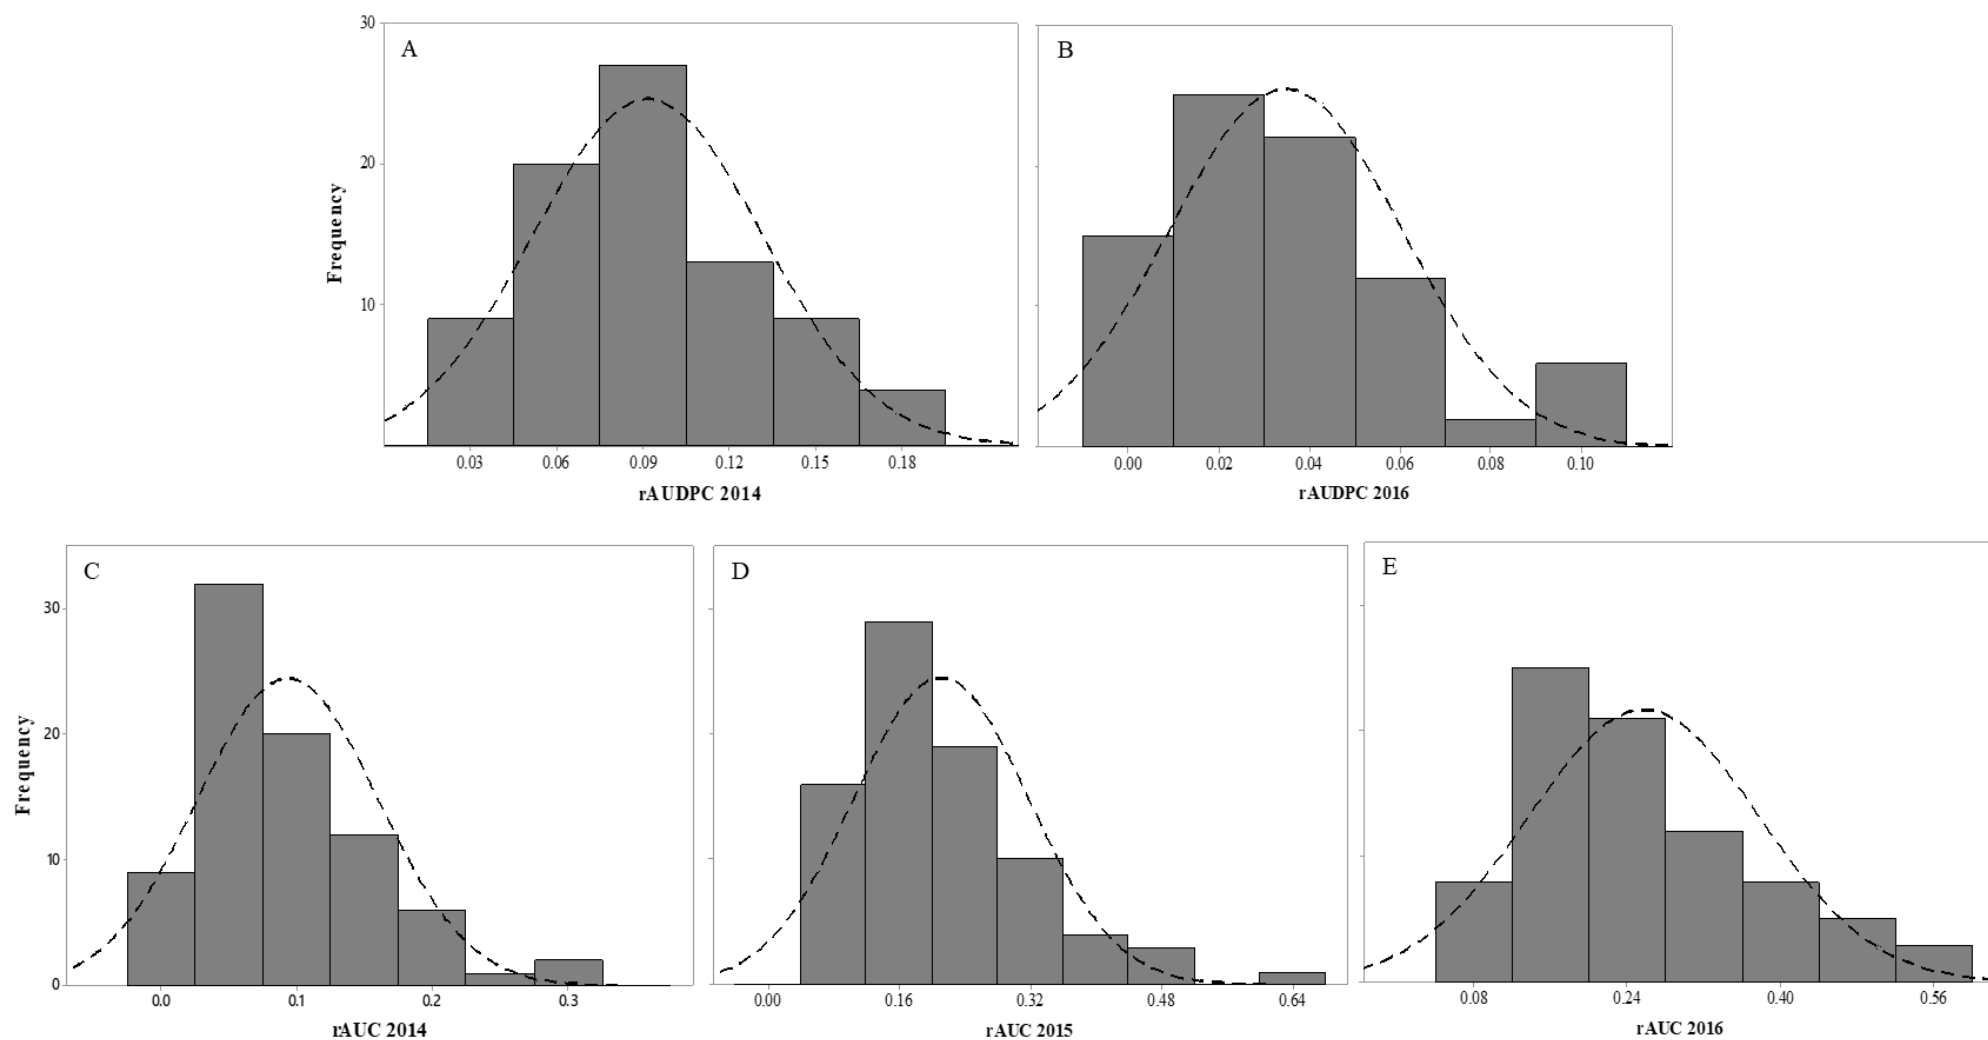

**Supplementary Figure 1.** Phenotype distributions of (A-B) relative area under the disease progress curve (rAUDPC) in 2014 and 2016 and (C-E) relative area under the defoliation curve (rAUC) in 2014, 2015 and 2016.
